# Supplementary material
Source: Springer Nature journal article supplement (https://www.springermedizin.de/resource/supplementary/12933_2012_488_MOESM1_ESM.pdf/9538614)
Supplement: MOESM1 [file 9538614]

## 1) Control Arm

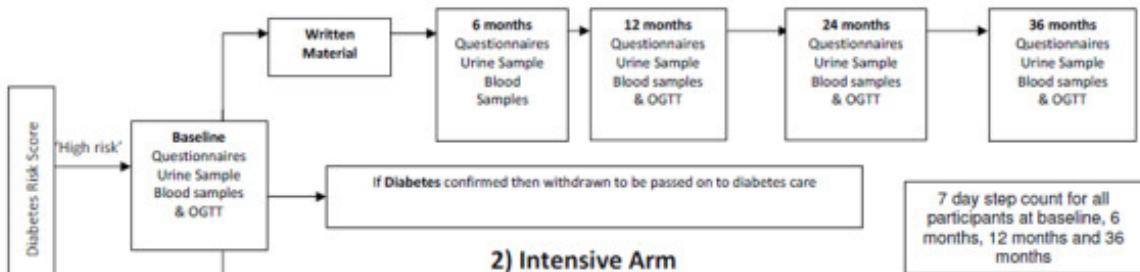

## 2) Intensive Arm

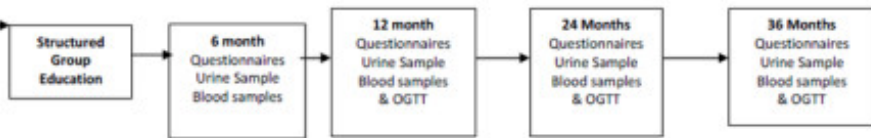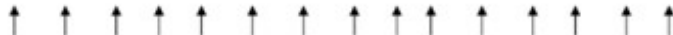

Continuous Support & Information – Drop-in sessions (One to One & Group); Dedicated Telephone Line; Newsletters; Email & SMS contact; Website
